# Supplementary material for: Synthesis and evaluation of a chitosan nanomaterial as efficient sorbent for determination of fungicide residues in waters and wine by liquid chromatography high resolution mass spectrometry
Source: Royal Society of Chemistry journal article supplement (doi:10.1039/d3ay02014b), 2024-01-01
Supplement: d3ay02014b1.pdf [file d3ay02014b1.pdf]

1 **Supplementary materials**

2

3 **Synthesis and evaluation of a chitosan nanomaterial as efficient sorbent for**  
4 **determination of fungicide residues in waters and wine by liquid**  
5 **chromatography high resolution mass spectrometry**

6

7 Lorenzo Martello <sup>a</sup>, Androniki Rapti<sup>b</sup>, Dimitrios N. Bikiaris <sup>b</sup>, Dimitra A. Lambropoulou <sup>a, c, \*</sup>

8

9 a. Environmental Pollution Control Laboratory, Department of Chemistry, Aristotle  
10 University of Thessaloniki, 54124, Thessaloniki, Greece

11 b. Laboratory of Polymer Chemistry and Technology, Department of Chemistry, Aristotle  
12 University of Thessaloniki, 54124, Thessaloniki, Greece

13 c. Centre for Interdisciplinary Research and Innovation (CIRI-AUTH), Balkan Center,  
14 Thessaloniki, 10th km-Thermi Rd, 57001, Thessaloniki, Greece

15 \* Corresponding author at **[dlambro@chem.auth.gr](mailto:dlambro@chem.auth.gr)**

Table S 1: Parameters of BET analysis

|                         |                       |
|-------------------------|-----------------------|
| Thickness method        | DeBoer                |
| Slope                   | 0.768                 |
| Intercept               | -0.637                |
| Correlation coefficient | 0.999385              |
| Micropore volume        | 0.000 cc/g            |
| External surface area   | 10 m <sup>2</sup> /g  |
| Micropore area          | 0.0 m <sup>2</sup> /g |

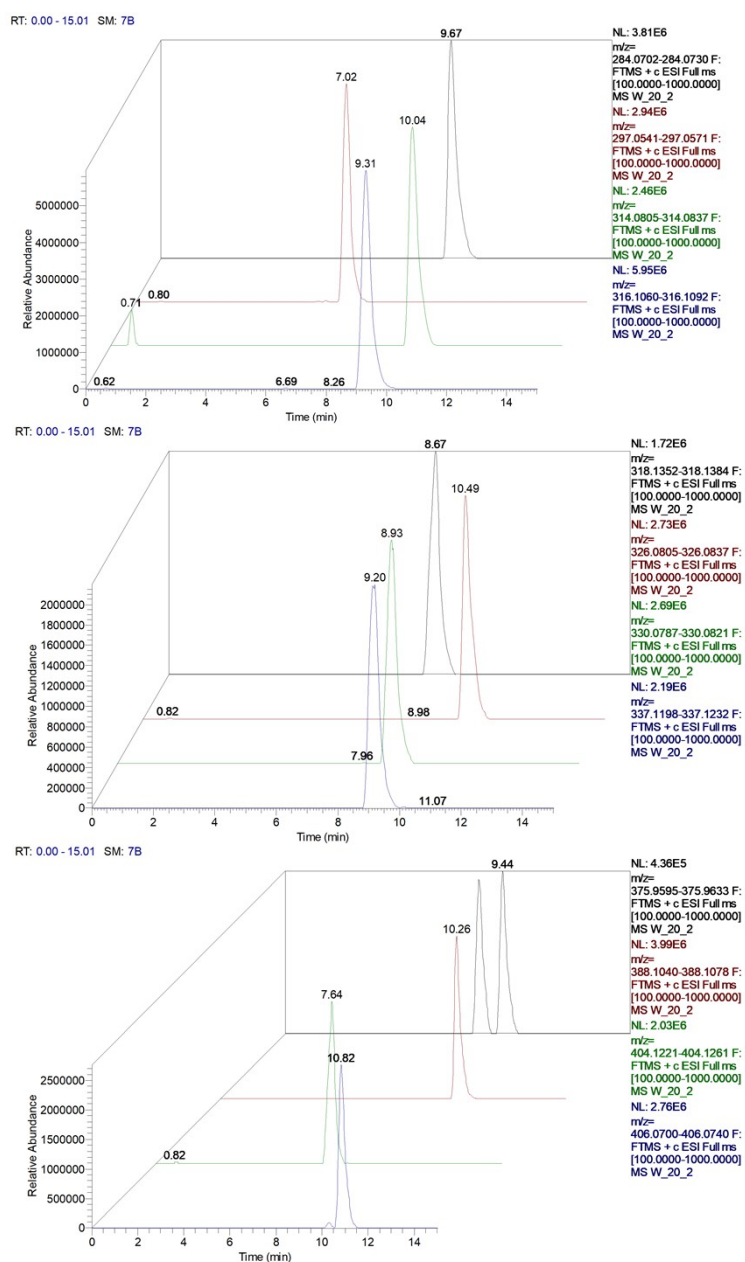

Figure S 1: Chromatograms of the 12 analytes after application of the proposed Nano-Cs-d-SPE method on wine spiked at 10 µg/kg.

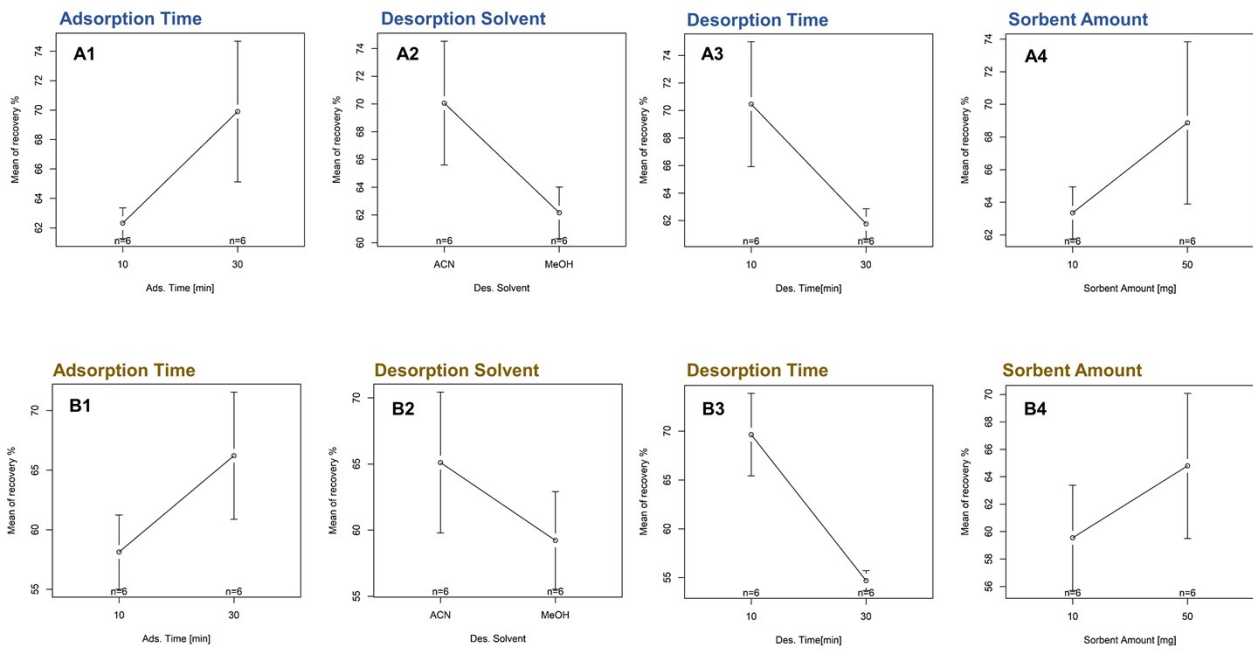

Figure S 2: Main effects plots derived from PBD, for the significant factors related to the application of Nano-Cs-NAT in water (A1, A2, A3, A4) and wine (B1, B2, B3, B4).

Table S 2: Factors and levels assessed in the Plackett-Burman design

| FACTORS                             | LEVELS  |         |
|-------------------------------------|---------|---------|
|                                     | -1      | 1       |
| <b>A: Desorption time</b>           | 10 min  | 30 min  |
| <b>B: Sample pH</b>                 | 4       | 10      |
| <b>C: Sorbent amount</b>            | 10 mg   | 50 mg   |
| <b>D: Adsorption time</b>           | 10 min  | 30 min  |
| <b>E: Agitation speed</b>           | 100 rpm | 200 rpm |
| <b>F: Desorption Solvent</b>        | MeOH    | ACN     |
| <b>G: Desorption solvent volume</b> | 2 ml    | 5 ml    |

Table S 3: Plackett-Burmann design of experiments performed on wine and water with the assessed 7 factors: A) Desorption time [min], B) Sample pH, C) Sorbent amount [mg], D) Adsorption time [min], E) Agitation speed [rpm], F) Desorption solvent, G) Desorption solvent volume.

| a  | b  | c  | d  | e  | f  | g  | A  | B  | C  | D  | E   | F    | G |
|----|----|----|----|----|----|----|----|----|----|----|-----|------|---|
| 1  | 1  | -1 | 1  | 1  | 1  | -1 | 30 | 10 | 10 | 30 | 200 | ACN  | 2 |
| -1 | 1  | 1  | -1 | 1  | 1  | 1  | 10 | 10 | 50 | 10 | 200 | ACN  | 5 |
| 1  | -1 | 1  | 1  | -1 | 1  | 1  | 30 | 4  | 50 | 30 | 100 | ACN  | 5 |
| -1 | 1  | -1 | 1  | 1  | -1 | 1  | 10 | 10 | 10 | 30 | 200 | MeOH | 5 |
| -1 | -1 | 1  | -1 | 1  | 1  | -1 | 10 | 4  | 50 | 10 | 200 | ACN  | 2 |
| -1 | -1 | -1 | 1  | -1 | 1  | 1  | 10 | 4  | 10 | 30 | 100 | ACN  | 5 |
| 1  | -1 | -1 | -1 | 1  | -1 | 1  | 30 | 4  | 10 | 10 | 200 | MeOH | 5 |
| 1  | 1  | -1 | -1 | -1 | 1  | -1 | 30 | 10 | 10 | 10 | 100 | ACN  | 2 |
| 1  | 1  | 1  | -1 | -1 | -1 | 1  | 30 | 10 | 50 | 10 | 100 | MeOH | 5 |
| -1 | 1  | 1  | 1  | -1 | -1 | -1 | 10 | 10 | 50 | 30 | 100 | MeOH | 2 |
| 1  | -1 | 1  | 1  | 1  | -1 | -1 | 30 | 4  | 50 | 30 | 200 | MeOH | 2 |
| -1 | -1 | -1 | -1 | -1 | -1 | -1 | 10 | 4  | 10 | 10 | 100 | MeOH | 2 |

Table S 4: Statistical significance for the seven factors screened through Plackett-Burman experimental design performed on spiked river water samples.

|                    | Estimate | Std. Error | t value | Pr(> t ) |     |
|--------------------|----------|------------|---------|----------|-----|
| <b>(Intercept)</b> | 66.1142  | 0.7859     | 84.124  | 1.2e-07  | *** |
| <b>A</b>           | -4.3475  | 0.7859     | -5.532  | 0.00522  | **  |
| <b>B</b>           | -0.7025  | 0.7859     | -0.894  | 0.42192  |     |
| <b>C</b>           | 2.7558   | 0.7859     | 3.507   | 0.02475  | *   |
| <b>D</b>           | -3.7892  | 0.7859     | -4.821  | 0.00851  | **  |
| <b>E</b>           | 1.8375   | 0.7859     | 2.338   | 0.07955  | .   |
| <b>F</b>           | 3.9508   | 0.7859     | 5.027   | 0.00735  | **  |
| <b>G</b>           | -0.8008  | 0.7859     | -1.019  | 0.36583  |     |

Table S 5: Statistical significance for the seven factors screened through Plackett-Burman experimental design performed on spiked wine samples.

|                    | Estimate | Std. Error | t value | Pr(> t ) |     |
|--------------------|----------|------------|---------|----------|-----|
| <b>(Intercept)</b> | 62.1717  | 0.9172     | 67.781  | 2.84e-07 | *** |
| <b>A</b>           | -7.4667  | 0.9172     | -8.140  | 0.00124  | **  |
| <b>B</b>           | -1.7367  | 0.9172     | -1.893  | 0.13124  |     |
| <b>C</b>           | 2.6217   | 0.9172     | 2.858   | 0.04601  | *   |
| <b>D</b>           | -4.0450  | 0.9172     | -4.410  | 0.01160  | *   |
| <b>E</b>           | -0.4083  | 0.9172     | -0.445  | 0.67922  |     |
| <b>F</b>           | 2.9433   | 0.9172     | 3.209   | 0.03262  | *   |
| <b>G</b>           | -0.6800  | 0.9172     | -0.741  | 0.49964  |     |

Table S 6: Box-Behnken design of experiments performed on wine and water to optimize the 3 factors A) Desorption time [min], B) Adsorption time [min] and C) Sorbent amount [mg].

| <b>a</b> | <b>b</b> | <b>c</b> | <b>A</b> | <b>B</b> | <b>C</b> |
|----------|----------|----------|----------|----------|----------|
| 1        | 0        | 1        | 10       | 30       | 60       |
| 1        | 0        | -1       | 10       | 30       | 20       |
| -1       | -1       | 0        | 2        | 20       | 40       |
| 1        | 1        | 0        | 10       | 40       | 40       |
| 0        | -1       | -1       | 6        | 20       | 20       |
| 0        | 0        | 0        | 6        | 30       | 40       |
| -1       | 0        | -1       | 2        | 30       | 20       |
| 0        | 0        | 0        | 6        | 30       | 40       |
| -1       | 1        | 0        | 2        | 40       | 40       |
| 0        | 1        | -1       | 6        | 40       | 20       |
| 0        | -1       | 1        | 6        | 20       | 60       |
| 0        | 0        | 0        | 6        | 30       | 40       |
| 1        | -1       | 0        | 10       | 20       | 40       |
| 0        | 0        | 0        | 6        | 30       | 40       |
| -1       | 0        | 1        | 2        | 30       | 60       |
| 0        | 1        | 1        | 6        | 40       | 60       |

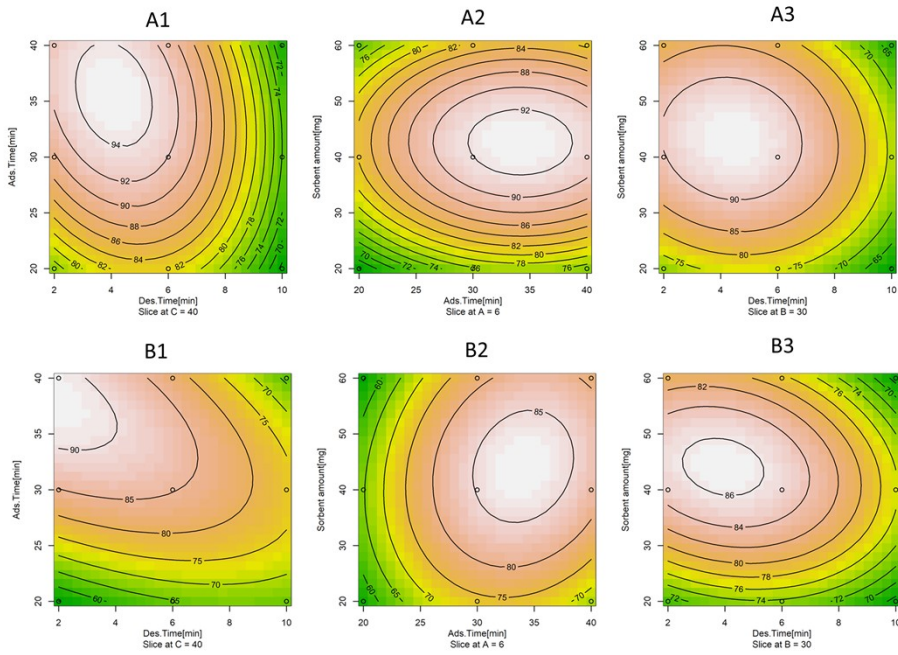

Figure S 3: Contour plots derived from the Box-Behnken design of experiments.

Table S 7: Effect on the response (fungicide average recovery from spiked river water samples) for the factors A) Desorption time, B) Adsorption time and C) Sorbent amount, their two-way interactions and their pure-quadratic interactions.

|                    | Estimate   | Std. Error | t value | Pr(> t )  |     |
|--------------------|------------|------------|---------|-----------|-----|
| <b>(Intercept)</b> | 91.978218  | 1.493912   | 61.5687 | 1.234e-09 | *** |
| <b>A</b>           | -7.907824  | 1.056355   | -7.4860 | 0.0002936 | *** |
| <b>B</b>           | 4.428306   | 1.056355   | 4.1921  | 0.0057361 | **  |
| <b>C</b>           | 3.459714   | 1.056355   | 3.2751  | 0.0169250 | *   |
| <b>A:B</b>         | -3.193871  | 1.493912   | -2.1379 | 0.0763689 |     |
| <b>A:C</b>         | -1.969921  | 1.493912   | -1.3186 | 0.2353869 |     |
| <b>B:C</b>         | -0.095923  | 1.493912   | -0.0642 | 0.9508893 |     |
| <b>A^2</b>         | -10.140816 | 1.493912   | -6.7881 | 0.0005001 | *** |
| <b>B^2</b>         | -5.318234  | 1.493912   | -3.5599 | 0.0119280 | *   |
| <b>C^2</b>         | -12.860478 | 1.493912   | -8.6086 | 0.0001352 | *** |

Table S 8: Effect on the response (fungicide average recovery from spiked wine samples) for the factors A) Desorption time, B) Adsorption time and C) Sorbent amount, their two-way interactions and their pure-quadratic interactions.

|                    | <b>Estimate</b> | <b>Std. Error</b> | <b>tA value</b> | <b>Pr(&gt; t )</b> |     |
|--------------------|-----------------|-------------------|-----------------|--------------------|-----|
| <b>(Intercept)</b> | 85.2282         | 2.0774            | 41.0258         | 1.402e-08          | *** |
| <b>A</b>           | -4.2828         | 1.4690            | -2.9155         | 0.0267863          | *   |
| <b>B</b>           | 8.8033          | 1.4690            | 5.9929          | 0.0009706          | *** |
| <b>C</b>           | 2.4597          | 1.4690            | 1.6745          | 0.1450634          |     |
| <b>A:B</b>         | -9.4439         | 2.0774            | -4.5459         | 0.0039086          | **  |
| <b>A:C</b>         | -2.4699         | 2.0774            | -1.1889         | 0.2793825          |     |
| <b>B:C</b>         | 3.4041          | 2.0774            | 1.6386          | 0.1524089          |     |
| <b>A^2</b>         | -4.6408         | 2.0774            | -2.2339         | 0.0669038          |     |
| <b>B^2</b>         | -11.8182        | 2.0774            | -5.6889         | 0.0012730          | **  |
| <b>C^2</b>         | -9.1105         | 2.0774            | -4.3855         | 0.0046407          | **  |

Table S 9: Extensive results for intra-day and inter-day recovery experiments and relative standard deviations (n=3).

|             | Spike $\mu\text{g/L}$ | Penconazole |      | Imazalil |      | Hexaconazole |      | Flusilazole |      | Triticonazole |      | Diniconazole |      | Epoconazole |      | Fenbuconazole |      | Bromuconazole |      | Pyraclostrobin |      | Azoxytrob<br>n |      | Difenoconazole |      |   |
|-------------|-----------------------|-------------|------|----------|------|--------------|------|-------------|------|---------------|------|--------------|------|-------------|------|---------------|------|---------------|------|----------------|------|----------------|------|----------------|------|---|
|             |                       | RE%         | RSD  | RE%      | RSD  | RE%          | RSD  | RE%         | RSD  | RE%           | RSD  | RE%          | RSD  | RE%         | RSD  | RE%           | RSD  | RE%           | RSD  | RE%            | RSD  | RE%            | RSD  | RE%            | RSD  |   |
| River water | Intra-day             | 0           | N.D. | -        | N.D. | -            | N.D. | -           | N.D. | -             | N.D. | -            | N.D. | -           | N.D. | -             | N.D. | -             | N.D. | -              | N.D. | -              | N.D. | -              | N.D. | - |
|             |                       | 0.2         | 73   | 4        | 74   | 8            | 77   | 6           | 78   | 6             | 72   | 7            | 82   | 6           | 85   | 5             | 81   | 4             | 76   | 5              | 80   | 5              | 80   | 5              | 85   | 5 |
|             |                       | 0.6         | 87   | 4        | 80   | 7            | 84   | 5           | 93   | 6             | 82   | 6            | 87   | 6           | 92   | 5             | 95   | 5             | 88   | 3              | 89   | 5              | 77   | 2              | 86   | 4 |
|             |                       | 2           | 92   | 2        | 90   | 1            | 97   | 2           | 94   | 5             | 94   | 3            | 97   | 3           | 96   | 4             | 93   | 3             | 87   | 1              | 94   | 3              | 92   | 3              | 96   | 4 |
|             | Inter-day             | 0           | N.D. | -        | N.D. | -            | N.D. | -           | N.D. | -             | N.D. | -            | N.D. | -           | N.D. | -             | N.D. | -             | N.D. | -              | N.D. | -              | N.D. | -              | N.D. | - |
|             |                       | 0.2         | 75   | 7        | 75   | 11           | 78   | 9           | 79   | 8             | 73   | 9            | 83   | 8           | 86   | 7             | 82   | 6             | 77   | 6              | 81   | 7              | 77   | 4              | 86   | 7 |
|             |                       | 0.6         | 88   | 5        | 81   | 8            | 85   | 6           | 93   | 5             | 82   | 8            | 87   | 7           | 92   | 5             | 96   | 5             | 88   | 4              | 89   | 5              | 78   | 3              | 87   | 5 |
|             |                       | 2           | 92   | 5        | 90   | 2            | 97   | 1           | 95   | 7             | 94   | 5            | 97   | 5           | 96   | 6             | 93   | 6             | 87   | 2              | 95   | 5              | 93   | 5              | 97   | 2 |
| Wine        | Intra-day             | 0           | N.D. | -        | N.D. | -            | N.D. | -           | N.D. | -             | N.D. | -            | N.D. | -           | N.D. | -             | N.D. | -             | N.D. | -              | N.D. | -              | N.D. | -              | N.D. | - |
|             |                       | 5           | 88   | 2        | 87   | 2            | 93   | 1           | 93   | 2             | 85   | 1            | 97   | 1           | 102  | 3             | 100  | 3             | 98   | 2              | 95   | 2              | 97   | 1              | 102  | 3 |
|             |                       | 10          | 98   | 2        | 97   | 3            | 93   | 2           | 104  | 3             | 90   | 1            | 98   | 1           | 102  | 5             | 102  | 1             | 93   | 2              | 101  | 3              | 96   | 2              | 100  | 2 |
|             |                       | 20          | 96   | 3        | 93   | 7            | 91   | 3           | 99   | 0             | 88   | 4            | 94   | 5           | 100  | 2             | 100  | 3             | 90   | 2              | 97   | 1              | 95   | 2              | 95   | 5 |
|             | Inter-day             | 0           | N.D. | -        | N.D. | -            | N.D. | -           | N.D. | -             | N.D. | -            | N.D. | -           | N.D. | -             | N.D. | -             | N.D. | -              | N.D. | -              | N.D. | -              | N.D. | - |
|             |                       | 5           | 89   | 5        | 88   | 4            | 93   | 4           | 93   | 2             | 86   | 4            | 97   | 2           | 102  | 2             | 101  | 7             | 98   | 2              | 95   | 2              | 97   | 4              | 102  | 2 |
|             |                       | 10          | 97   | 6        | 96   | 5            | 92   | 2           | 103  | 7             | 89   | 6            | 97   | 3           | 101  | 8             | 101  | 4             | 93   | 3              | 100  | 7              | 95   | 5              | 100  | 6 |
|             |                       | 20          | 96   | 6        | 93   | 11           | 92   | 6           | 99   | 4             | 88   | 6            | 94   | 8           | 101  | 2             | 100  | 3             | 90   | 3              | 98   | 3              | 96   | 6              | 95   | 8 |
